# Supplementary material for: Real-world data on the efficacy and safety of pazopanib in IMDC favorable- and intermediate-risk metastatic renal cell carcinoma: a multicenter retrospective cohort study of Chinese patients
Source: PubMed Central journal article supplement — Transl Androl Urol. 2022 May;11(5):694–709. doi: 10.21037/tau-22-312 (PMC9177258; doi:10.21037/tau-22-312), 2022-05
Supplement: tau-11-05-694-supplementary.pdf [file tau-11-05-694-supplementary.pdf]

**Table S1** Summary of target treatment lines

| Target therapy                                | All (N=143) |
|-----------------------------------------------|-------------|
| Patients with first line target therapy only  | 103         |
| Pazopanib                                     | 103 (72.0%) |
| Treatment ongoing                             |             |
| No                                            | 37 (35.9%)  |
| Yes                                           | 66 (64.1%)  |
| Patients switch to second line target therapy | 34          |
| Pazopanib/axitinib                            | 24 (16.8%)  |
| Pazopanib/everolimus                          | 6 (4.2%)    |
| Pazopanib/sorafenib                           | 3 (2.1%)    |
| Pazopanib/sunitinib                           | 1 (0.7%)    |
| Patients switch to third line target therapy  | 6           |
| Pazopanib/axitinib/axitinib                   | 1 (0.7%)    |
| Pazopanib/axitinib/everolimus                 | 1 (0.7%)    |
| Pazopanib/axitinib/sunitinib                  | 1 (0.7%)    |
| Pazopanib/everolimus/axitinib                 | 1 (0.7%)    |
| Pazopanib/everolimus/cabozatinib              | 1 (0.7%)    |
| Pazopanib/sunitinib/axitinib                  | 1 (0.7%)    |
